# Supplementary material for: Real time optical monitoring of cascade mechanochemical reactions and capture of ultra-unstable intermediates under hydrostatic pressure
Source: Royal Society of Chemistry journal article supplement (doi:10.1039/d3qm00282a), 2023-01-01
Supplement: d3qm00282a1.pdf [file d3qm00282a1.pdf]

## Electronic Supplementary Information

### Real time optical monitoring of cascade mechanochemical reaction and capture of ultra-unstable intermediate under hydrostatic pressure

Xing Su,<sup>a,b,d</sup> Li Nan,<sup>c</sup> Kai Wang,<sup>c,e</sup> Qian Li,<sup>e</sup> Weiguang Shao,<sup>d</sup> Lulu Liu,<sup>a</sup> Binhong

Yu,<sup>a</sup> Yu-Mo Zhang,<sup>a</sup> Tingting Lin,<sup>\*b</sup> Bo Zou,<sup>\*c</sup> Yifei Liu<sup>\*a</sup> and Sean Xiao-An Zhang<sup>a</sup>

<sup>a</sup> College of Chemistry, Jilin University, Changchun 130012, P. R. China

<sup>b</sup> College of Instrumentation and Electrical Engineering, Jilin University, Changchun 130061, P. R. China

<sup>c</sup> State Key Laboratory of Superhard Materials, Jilin University, Changchun 130012, P. R. China

<sup>d</sup> Institute of Systems Engineering, Academy of Military Science, Beijing 102399, P. R. China

<sup>e</sup> Shandong Key Laboratory of Optical Communication Science and Technology, School of Physics Science and Information Technology, Liaocheng University, Liaocheng 252000, P.R. China

\*Corresponding Authors. E-mail: liuyifei@jlu.edu.cn, tlin@jlu.edu.cn, zoubo@jlu.edu.cn



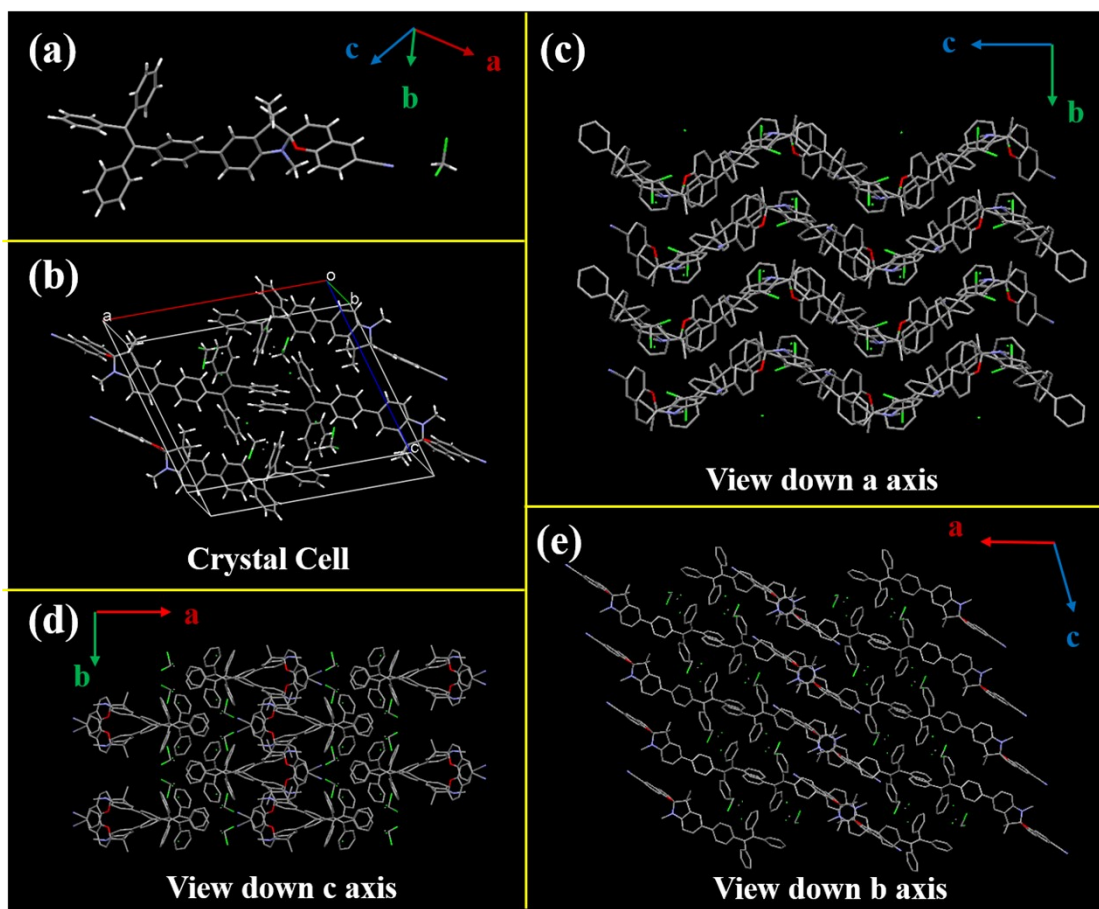

**Fig. S1** (a) The molecular structure of TPE-Sp-CN in single crystal. (b) The unit cell of TPE-Sp-CN single crystal, and the packing patterns viewed down (c) a axis, (d) c axis and (e) b axis, respectively.

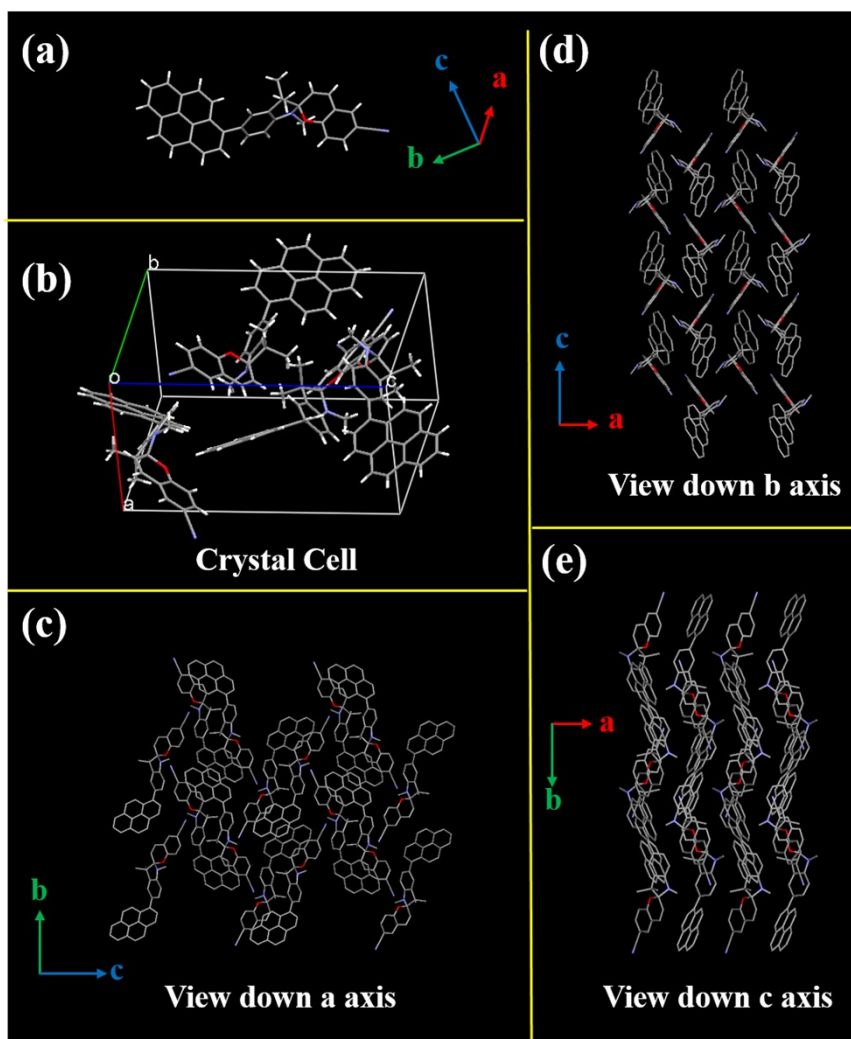

**Fig. S2** (a) The molecular structure of Py-Sp-CN in single crystal. (b) The unit cell of Py-Sp-CN single crystal, and the packing patterns viewed down (c) *a* axis, (d) *b* axis and (e) *c* axis, respectively.

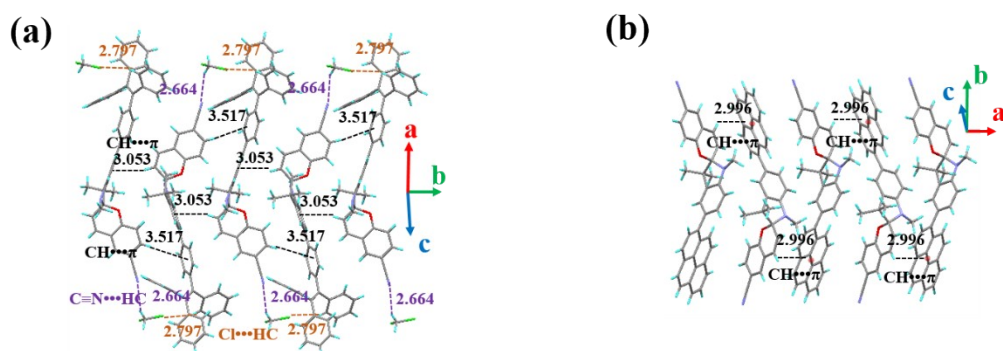

**Fig. S3** Illustration of intermolecular interactions of (a) cTPE-Sp-CN and (b) cPy-Sp-CN.

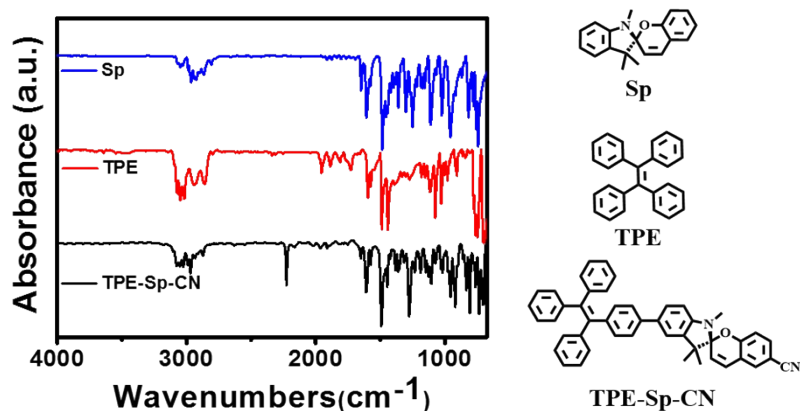

**Fig. S4** The IR spectra of TPE-Sp-CN and corresponding fragments. IR spectra of spiropyran (Sp), tetraphenylethene (TPE) and TPE-Sp-CN.

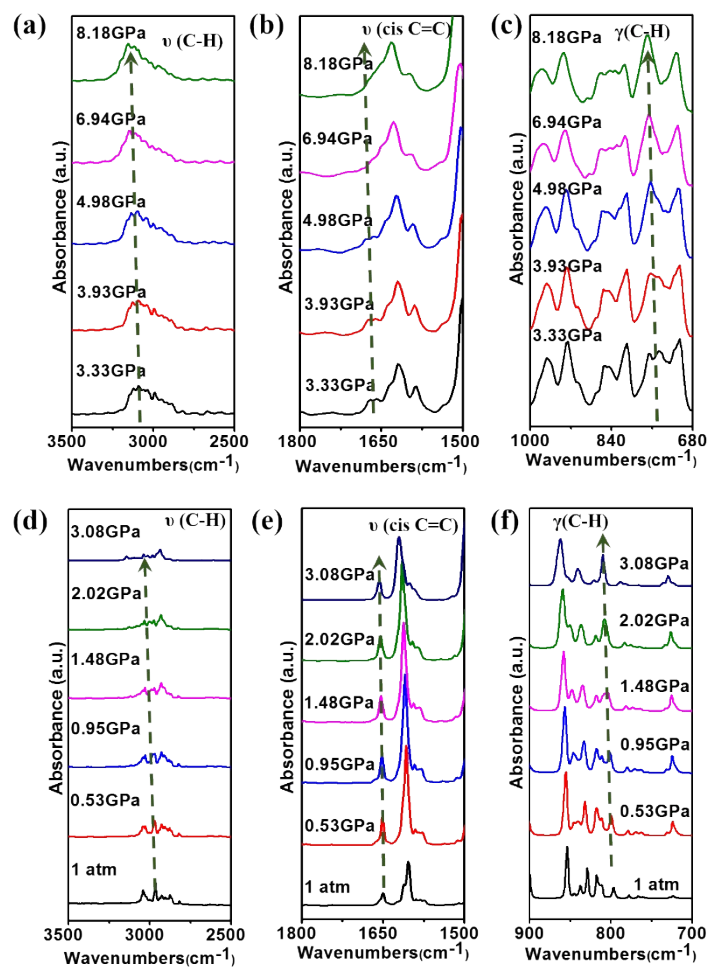

**Fig S5** High-pressure IR spectra of (a-c) cTPE-Sp-CN and (d-f) cPy-Sp-CN in the regions of  $\nu(\text{C-H})$ ,  $\nu(\text{cis C=C})$  and  $\gamma(\text{C-H})$  vibration modes.

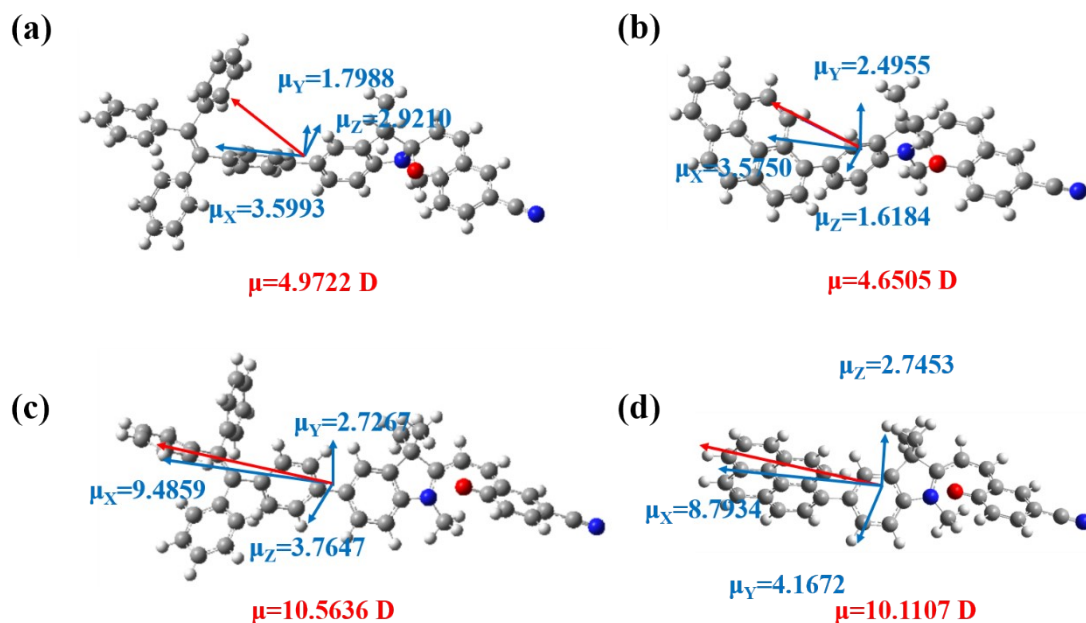

**Fig. S6** The dipole moment calculations for ring closed and *cis*-structure of TPE and pyrene decorated spiropyrans. The dipole moments of (a) TPE-Sp-CN and (b) Py-Sp-CN in single crystal. The dipole moments of optimized (c) TPE-MC-CN-*cis* and (d) Py-MC-CN-*cis*. All the dipole moments were calculated by Gaussian 09 with basis set of B3LYP/6-31G (d).

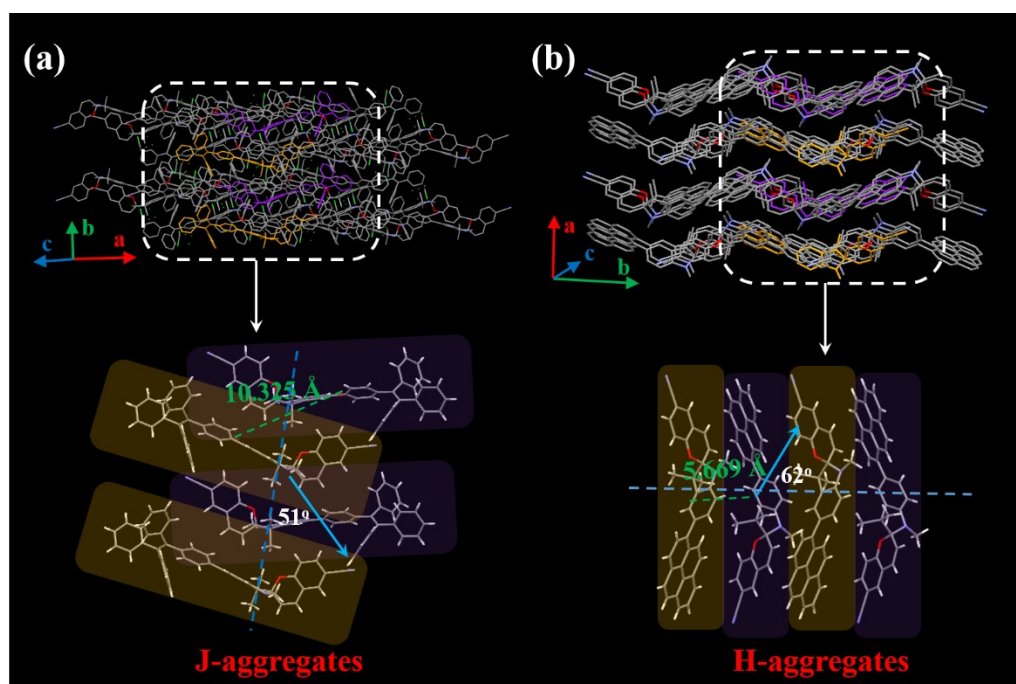

**Fig. S7** The geometric central distances of molecules in (a) cTPE-Sp-CN and (b) cPy-Sp-CN. Slip angles are about 51° and 62° for TPE-Sp-CN and Py-Sp-CN, respectively. (J-aggregates: slip angle < 54.7°, H-aggregates: slip angle > 54.7°)

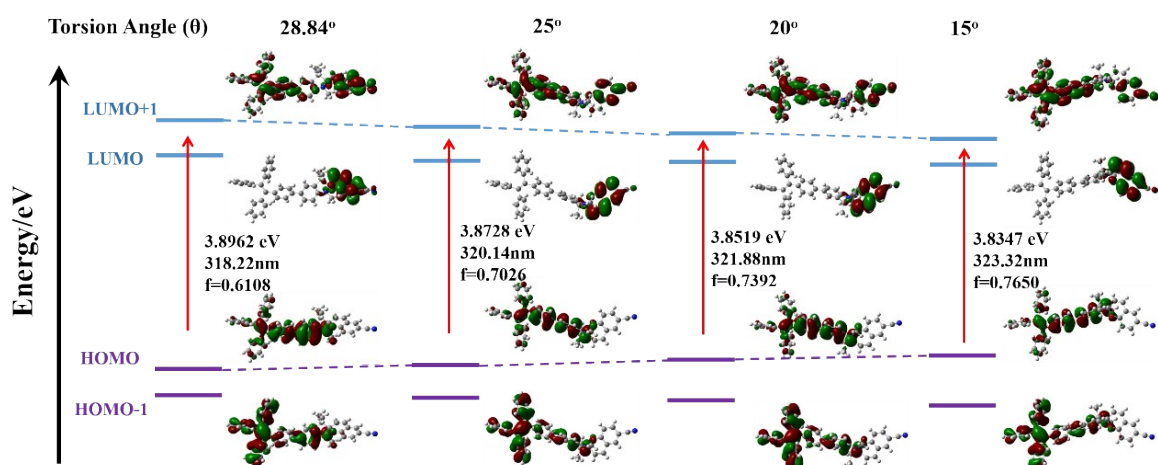

**Fig. S8** The orbital amplitude plots and corresponding band gaps of TPE-Sp-CN in fixed conformation with gradually decreased torsion angles ( $\theta$ ) between TPE and spiropyran moieties. The plots were depicted by Gaussian 09 with basis set of B3LYP/6-31G (d), and f is the oscillator strength.

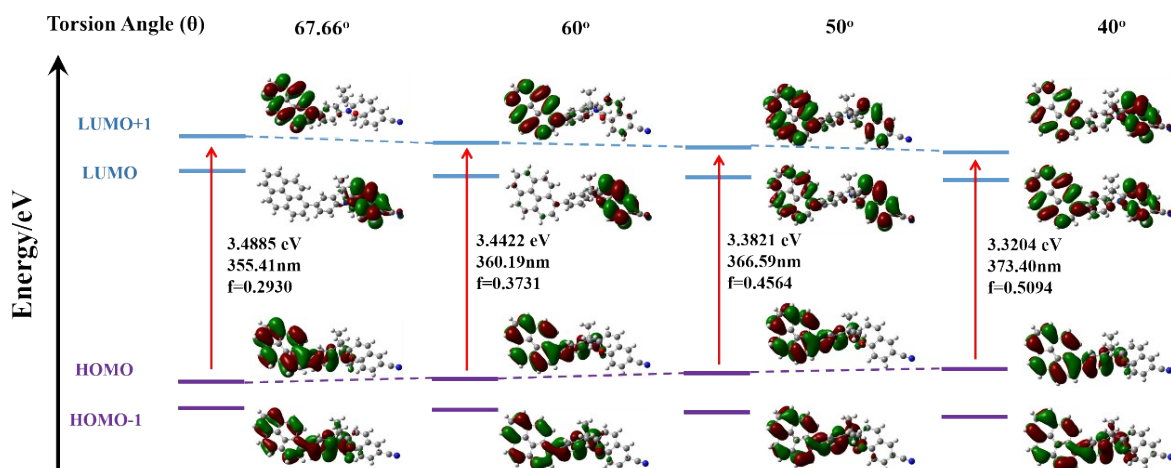

**Fig. S9** The orbital amplitude plots and corresponding band gaps of Py-Sp-CN in fixed conformation with gradually decreased torsion angles ( $\theta$ ) between pyrene and spiropyran moieties. The plots were depicted by Gaussian 09 with basis set of B3LYP/6-31G (d), and f is the oscillator strength.

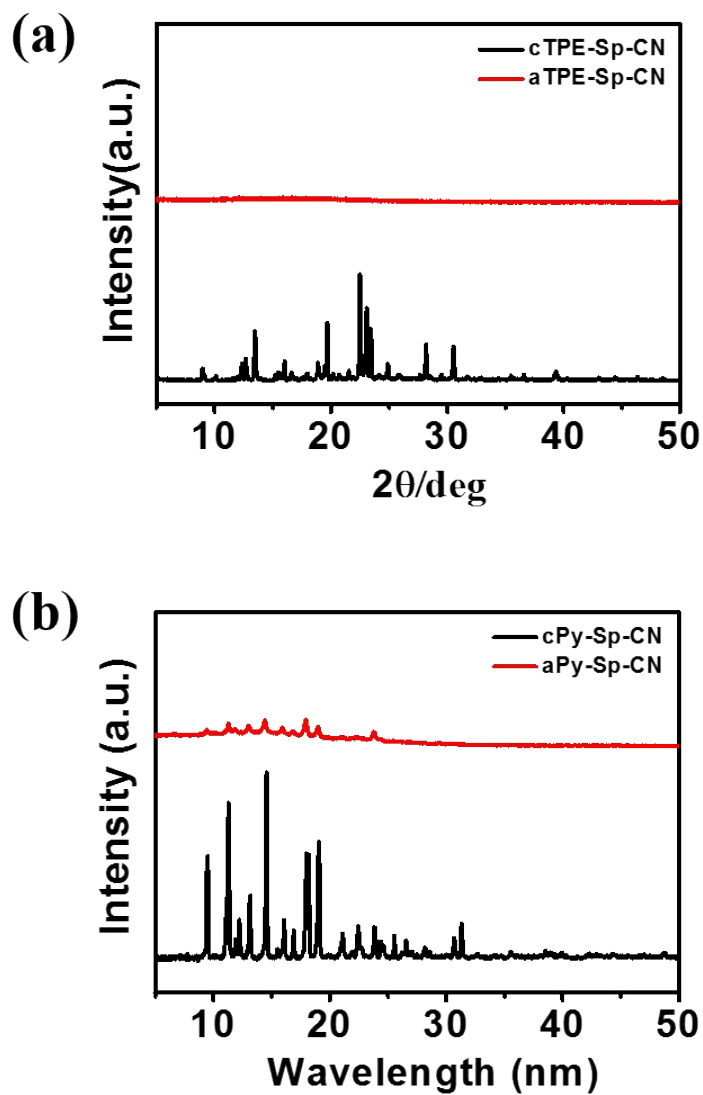

**Fig. S10** (a) XRD patterns of cTPE-Sp-CN and aTPE-Sp-CN, (b) XRD patterns of cPy-Sp-CN and aPy-Sp-CN. The reduction and disappearance of XRD peaks meant that the crystal states changed into amorphous states.



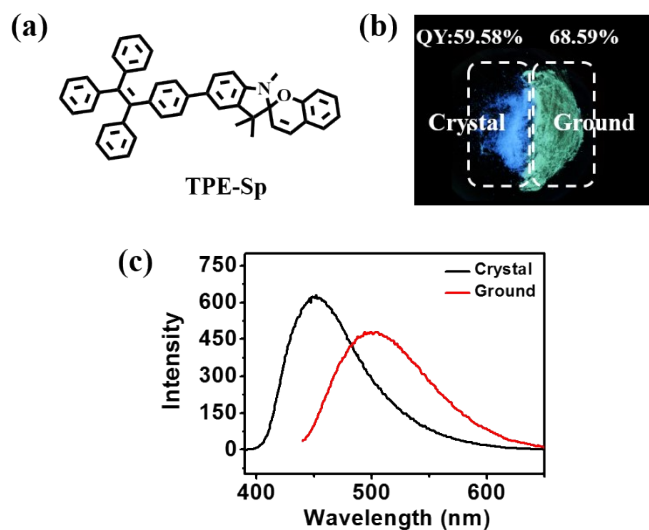

**Fig. S11** (a) The structure of TPE-Sp, (b) fluorescent images and (c) PL spectra of TPE-Sp crystal before and after grinding treatment. The corresponding quantum yield (QY) were depicted in fluorescent images.

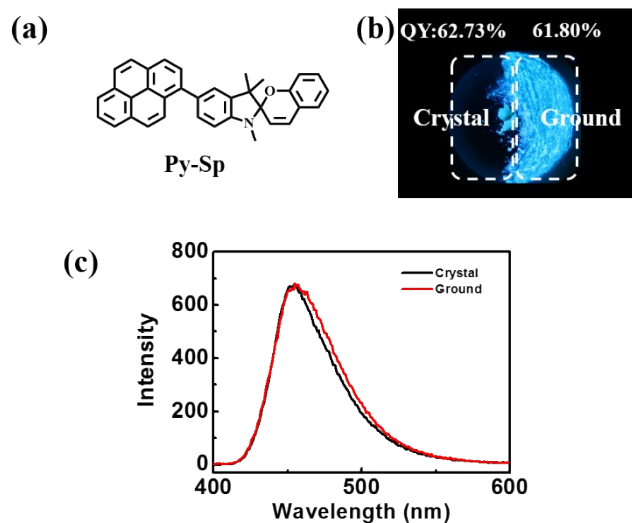

**Fig. S12** (a) The structure of Py-Sp, (b) fluorescent images and (c) PL spectra of Py-Sp crystal before and after grinding treatment. The corresponding quantum yield (QY) were depicted in fluorescent images.

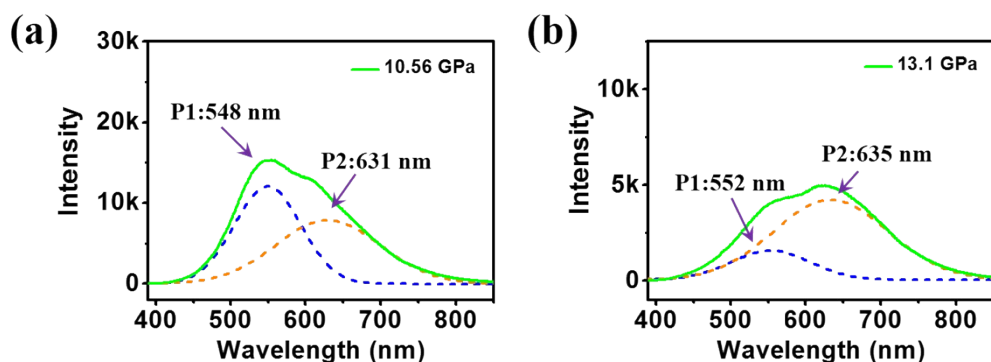

**Fig. S13** The peak fittings of PL spectra of cTPE-Sp-CN at (a) 10.56 GPa (Adj. R-Square=0.996539) and (b) 13.1 GPa (Adj. R-Square=0.996653) in pressurization process.

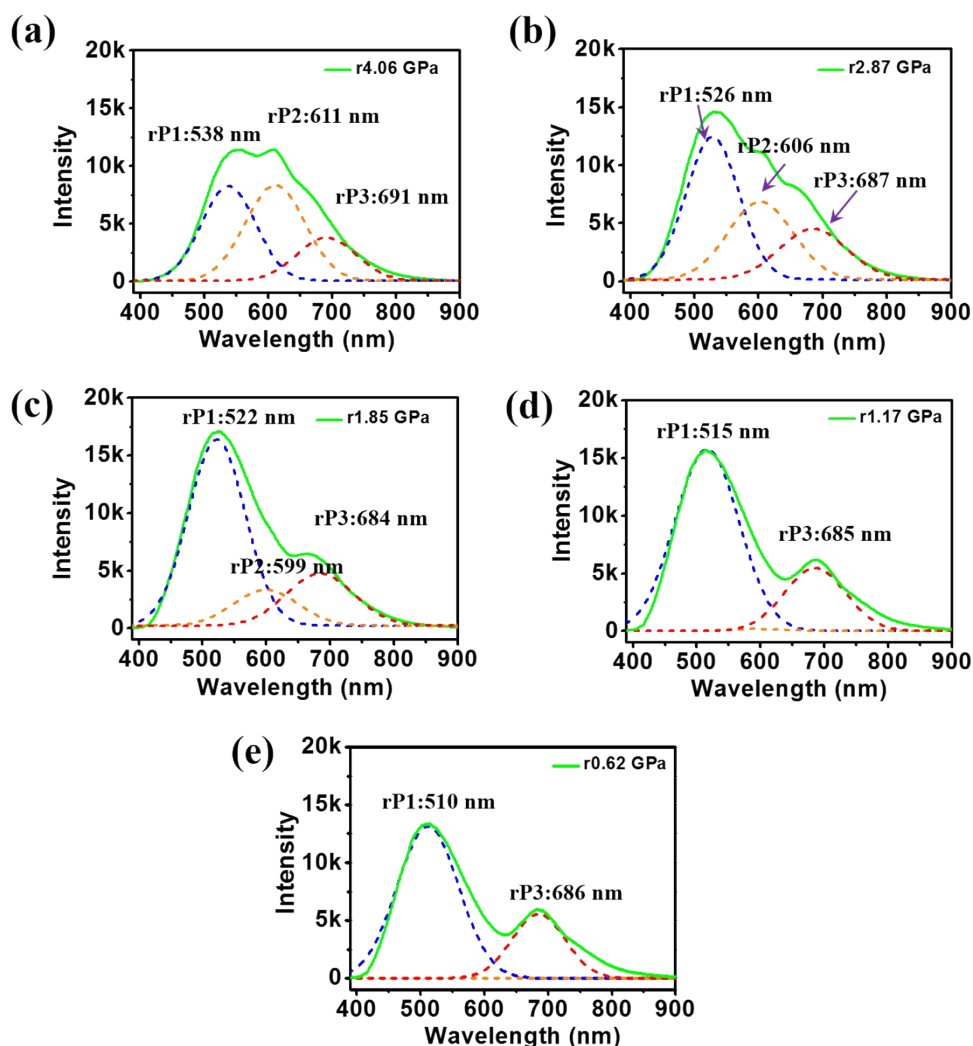

**Fig. S14** The peak fittings of PL spectra of cTPE-Sp-CN at (a) 4.06 GPa (Adj. R-Square=0.995115), (b) 2.87 GPa (Adj. R-Square=0.993276), (c) 1.85 GPa (Adj. R-Square=0.995217), (d) 1.17 GPa (Adj. R-Square=0.992199), (e) 0.62 GPa (Adj. R-Square=0.993325) in the depressurization process.

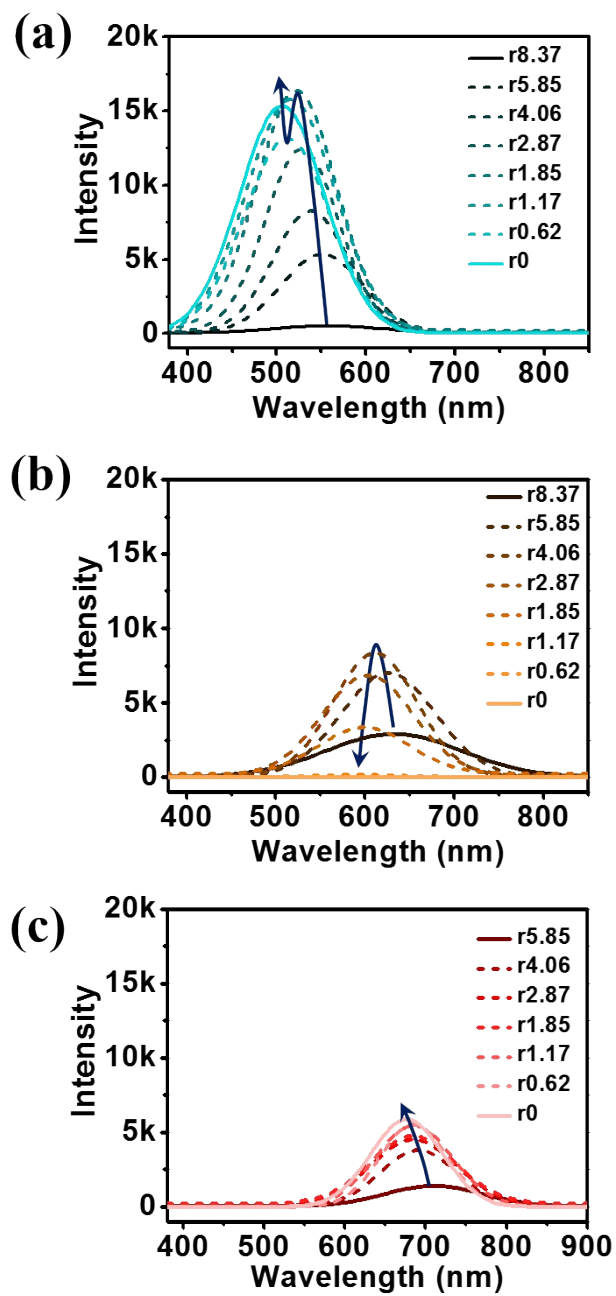

**Fig. S15** The PL spectra of (a) rP1, (b) rP2 and (c) rP3 after peak fitted with decreasing pressure, respectively.

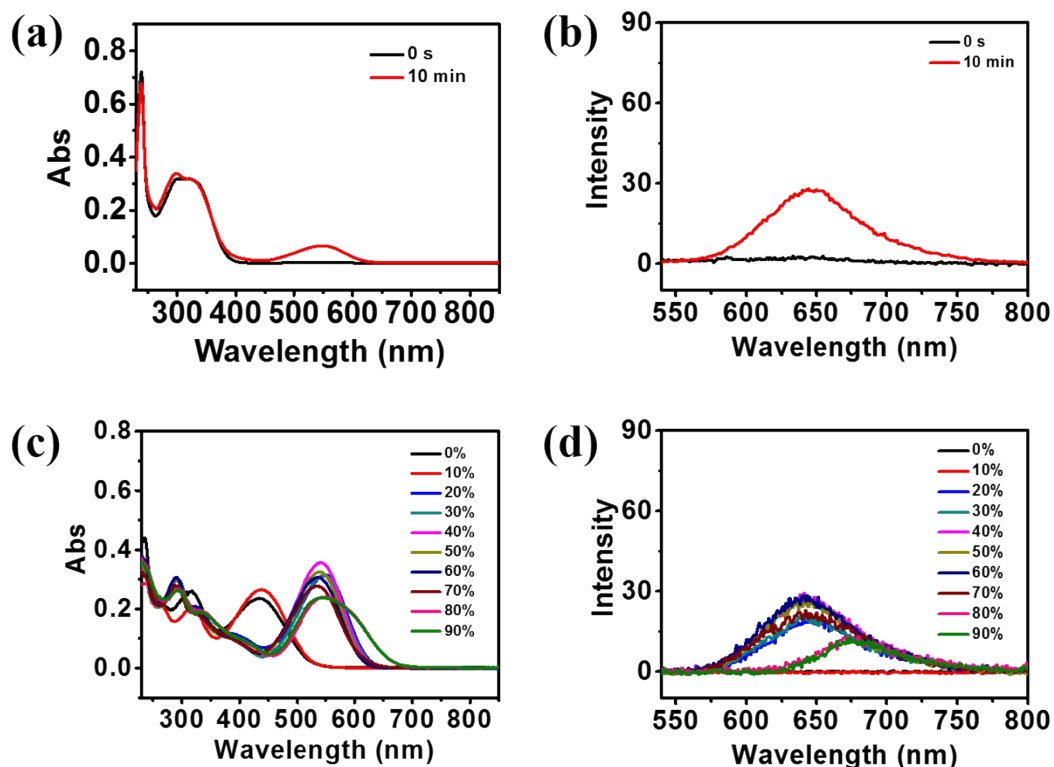

**Fig. S16** (a) Absorption spectra and (b) PL spectra of TPE-Sp-CN solution ( $1 \times 10^{-5}$  M, methanol) before and after treated with ten minutes of 254 nm UV light. (c) Absorption spectra and (d) PL spectra of TPE-MCH-CN (TPE-Sp-CN treated with 20 eq. HCl ( $2 \times 10^{-4}$  M) to generate this protonated ring-open form,  $1 \times 10^{-5}$  M) in different volume fraction of MeCN/H<sub>2</sub>O mixture, respectively. After UV light irradiation, TPE-Sp-CN switched to its non-protonated MC-*trans* form (TPE-MC-CN-*trans*), the absorption of TPE-MC-CN-*trans* is about 548 nm and the corresponding PL is located at about 646 nm. As for TPE-MCH-CN, when water fraction higher than 10% (20%-70%), TPE-MCH-CN lost proton, and TPE-MC-CN-*trans* formed since the absorption red shifted from 438 nm to about 550 nm, the corresponding emissions were about 644 nm, which is similar to the UV light induced TPE-MC-CN-*trans*. When the water fraction further increased to 80% and 90%, aggregation of TPE-MC-CN-*trans* generated, and the corresponding emission further red shifted to 676 nm. This indicates that the emission at 677 nm in Fig. 4c should originate from TPE-MC-CN-*trans*.

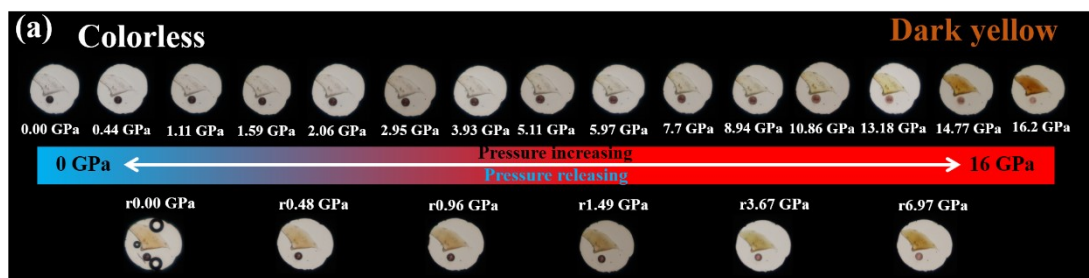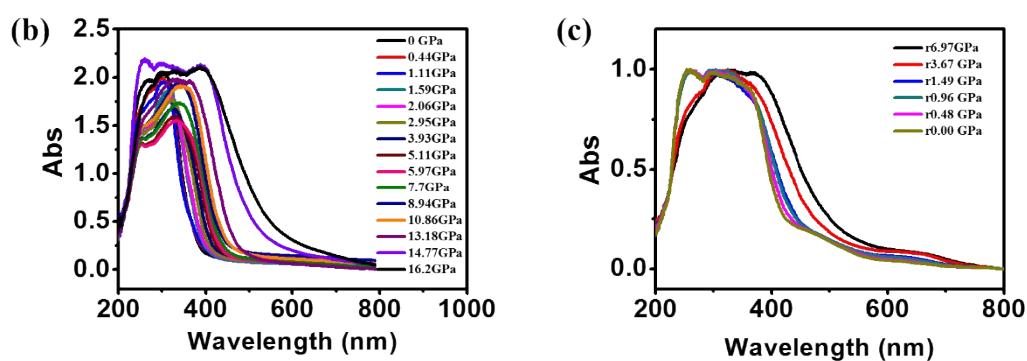

**Fig. S17** (a) The pictures of cTPE-Sp-CN in the pressurizing and depressurizing process under ambient light. The in situ absorption spectra of cTPE-Sp-CN in the (b) pressurizing process and (c) depressurizing process.

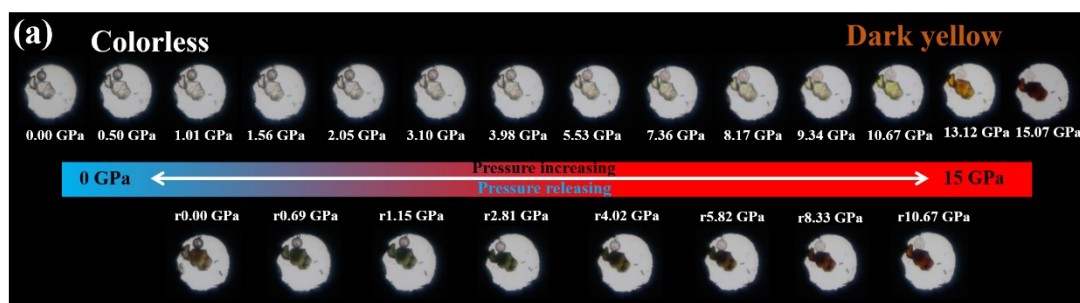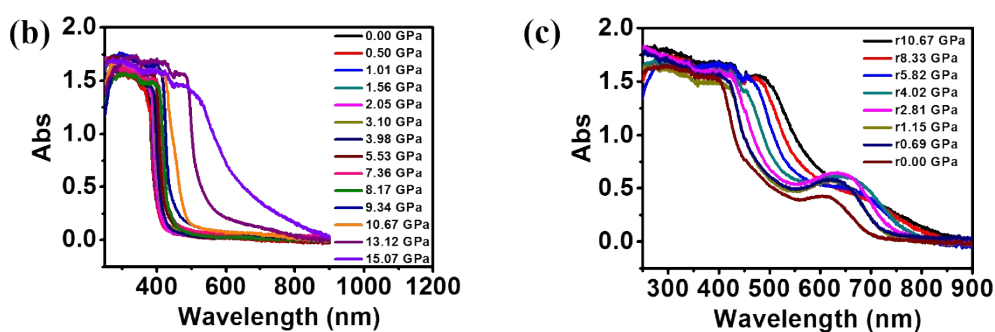

**Fig. S18** (a) The pictures of cPy-Sp-CN in the pressurizing and depressurizing process under ambient light. The in situ absorption spectra of cPy-Sp-CN in the (b) pressurizing process and (c) depressurizing process.

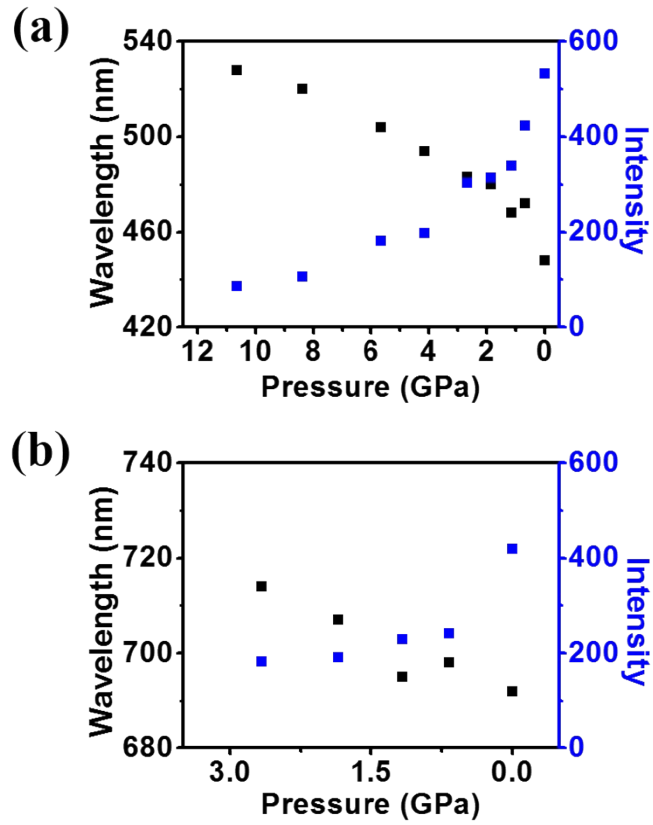

**Fig. S19** The emissive changing trends of cPy-Sp-CN. The changing trends of wavelength and emissive intensity of (a) rP1' and (b) rP2' of cPy-Sp-CN with decreasing pressure, respectively.

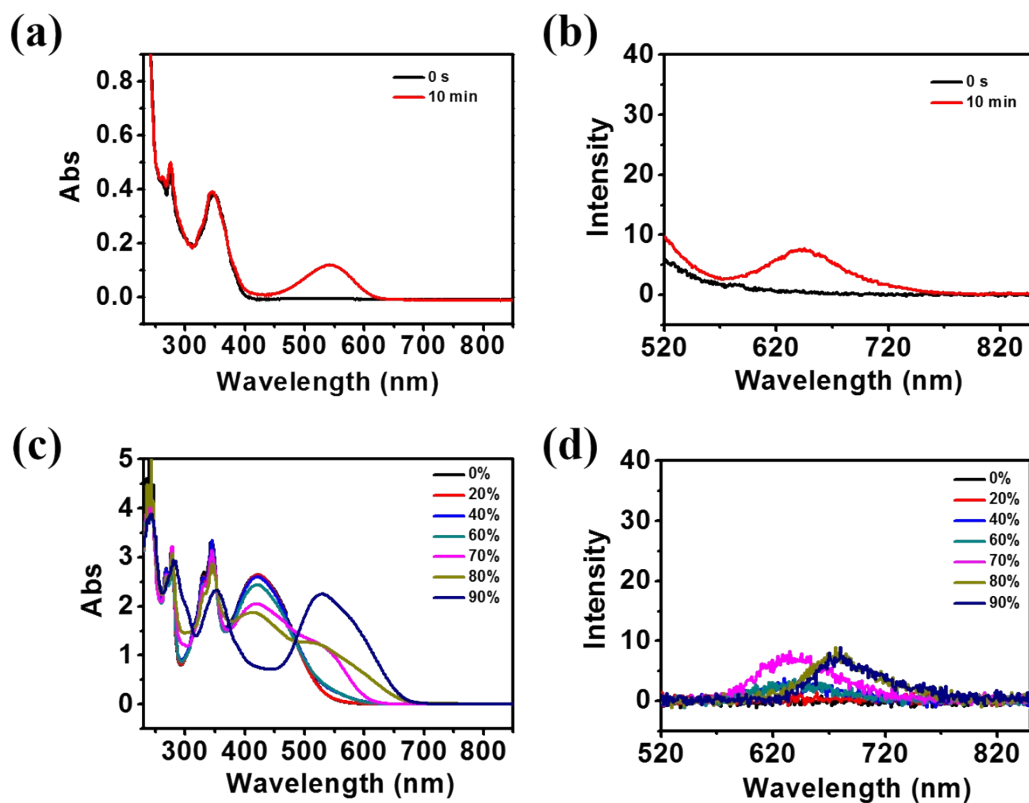

**Fig. S20** (a) Absorption spectra and (b) PL spectra of Py-Sp-CN solution ( $1 \times 10^{-5}$  M, methanol) before and after treated with ten minutes of 254 nm UV light. (c) Absorption spectra and (d) PL spectra of Py-MCH-CN (Py-Sp-CN treated with 2 eq. HCl ( $2 \times 10^{-4}$  M) to generate this protonated ring-open form,  $1 \times 10^{-4}$  M) in different volume fraction of MeCN/H<sub>2</sub>O mixture, respectively. After UV light irradiation, Py-Sp-CN switched to its non-protonated MC-*trans* form (Py-MC-CN-*trans*), the absorption of Py-MC-CN-*trans* is at about 545 nm and the corresponding PL located at about 644 nm. Similar to the TPE-MCH-CN system, when water fraction reach 80% and 90%, obvious deprotonation process occurred as the absorption peak at about 541 nm appeared, and the emission of Py-MC-CN-*trans* aggregates red shifted from 641 nm to 681 nm. This indicates that the emission at 692 nm in Fig. 4c should originate from Py-MC-CN-*trans*.

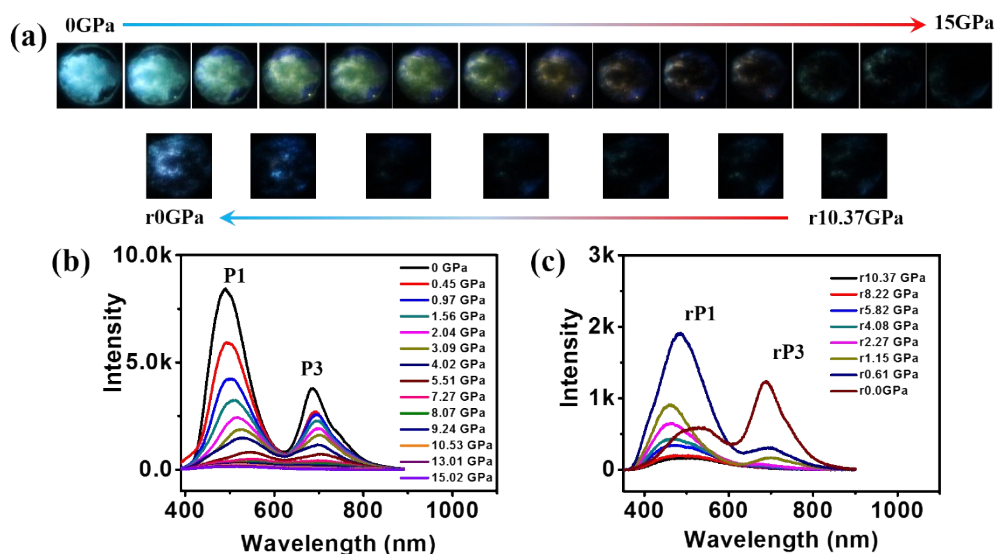

**Fig. S21** (a) Fluorescent images of amorphous TPE-Sp-CN in the pressurizing and depressurizing process. (b) PL spectra of amorphous TPE-Sp-CN with increasing hydrostatic pressure. (c) PL spectra of amorphous TPE-Sp-CN with decreasing hydrostatic pressure.

In order to obtain completely amorphous state, elaborative machine-grinding was exerted to cTPE-Sp-CN. While under high shear force, partial TPE-Sp-CN was switched to MC-*trans* form (TPE-MC-CN-*trans*), and the P3 was found at 0 GPa (Fig. S21b). Throughout the pressurizing process (0 GPa~15GPa) and depressurizing process (15 GPa~r0 GPa), only P1, P3, rP1 and rP3 can be found. This means that without suitable intermolecular interactions and topological structure, the ultra-unstable MC-*cis* form (TPE-MC-CN-*cis*) couldn't be captured.



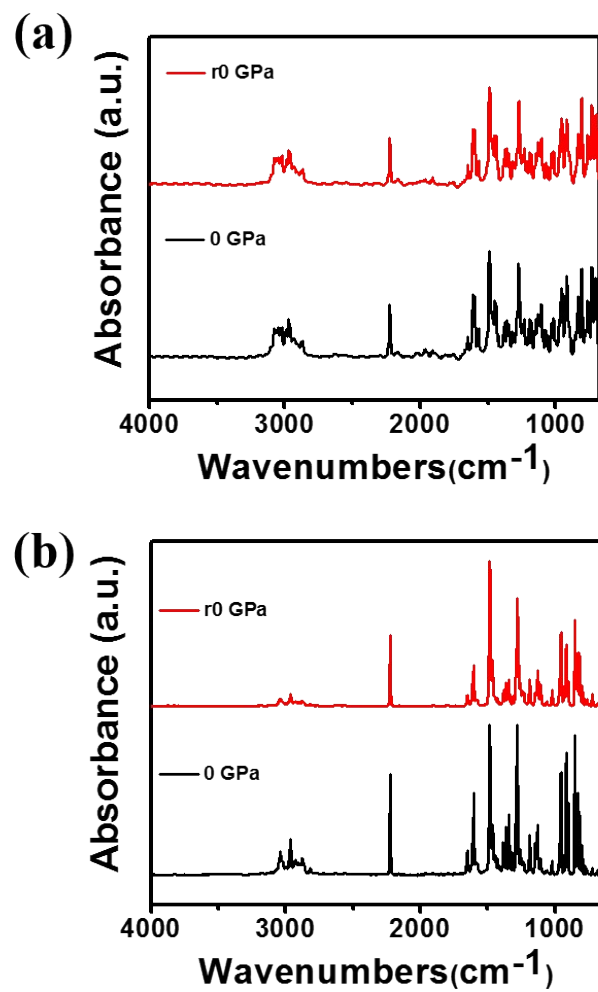

**Fig. S22** The IR spectra of (a) cTPE-Sp-CN and (b) cPy-Sp-CN before pressure was exerted and after pressure was released.

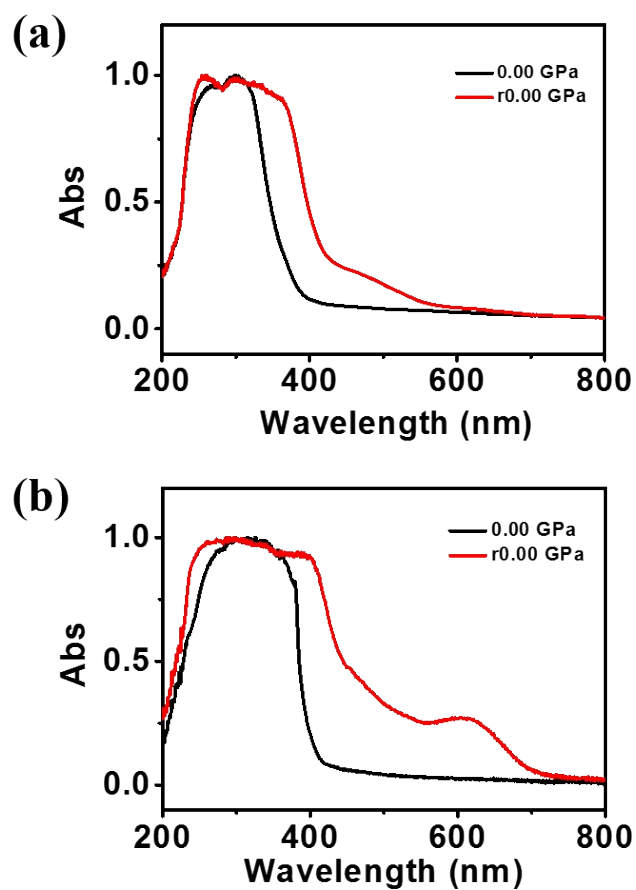

**Fig. S23** The absorption spectra of (a) cTPE-Sp-CN and (b) cPy-Sp-CN before pressure was exerted and after pressure was released.

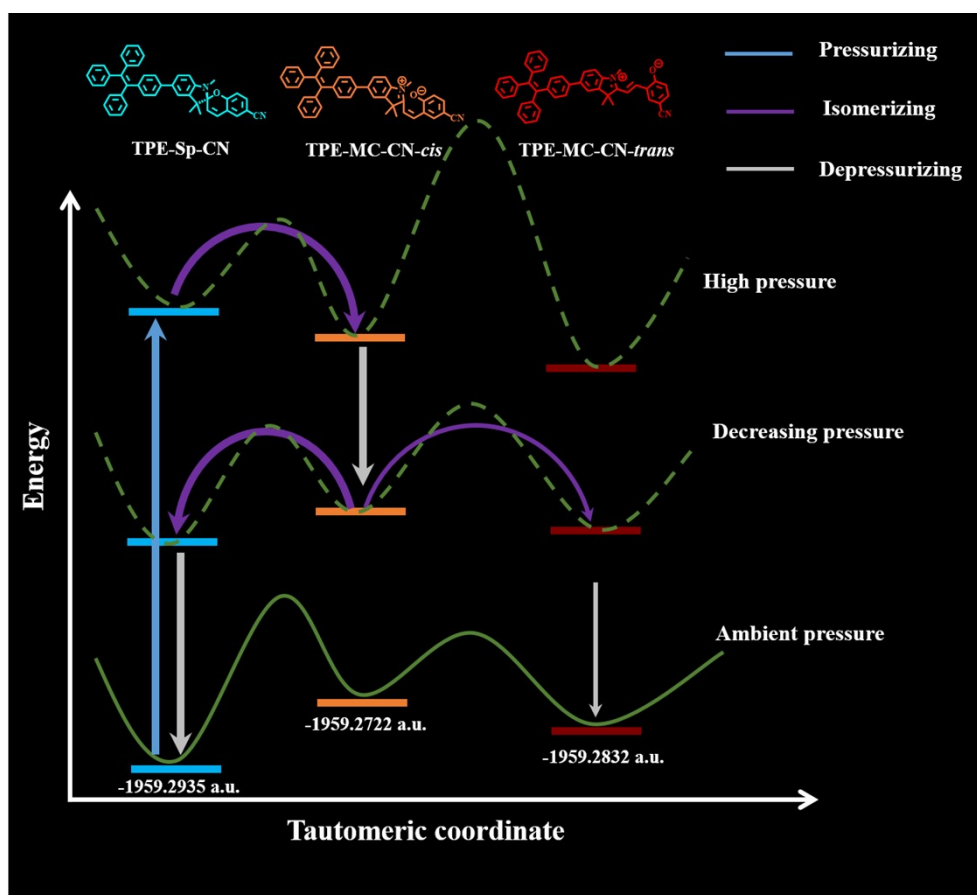

**Fig. S24** The proposed potential energy diagram of TPE-Sp-CN, TPE-MC-CN-*cis* and TPE-MC-CN-*trans* under low pressure and high pressure.

**Table S1.** The quantum yields, lifetimes, irradiation rate and non-irradiation rates of cTPE-Sp-CN, aTPE-Sp-CN, cPy-Sp-CN and aPy-Sp-CN.

| Sample     | $\Phi_f$ (%) | $\tau_1$            | $\tau_2$            | $K_r$                              | $K_{nr}$                           |
|------------|--------------|---------------------|---------------------|------------------------------------|------------------------------------|
| cTPE-Sp-CN | 6.15%        | 1.40 ns<br>(34.02%) | 3.04 ns<br>(65.98%) | $2.477 \times 10^7 \text{ s}^{-1}$ | $3.781 \times 10^8 \text{ s}^{-1}$ |
| aTPE-Sp-CN | 34.62%       | 1.47 ns<br>(41.29%) | 3.61 ns<br>(58.71%) | $1.270 \times 10^8 \text{ s}^{-1}$ | $2.398 \times 10^8 \text{ s}^{-1}$ |
| cPy-Sp-CN  | 2.22%        | 0.94 ns<br>(70.55%) | 2.80 ns<br>(29.45%) | $1.492 \times 10^7 \text{ s}^{-1}$ | $6.572 \times 10^8 \text{ s}^{-1}$ |
| aPy-Sp-CN  | 7.10%        | 1.00 ns<br>(72.43%) | 3.73 ns<br>(27.57%) | $4.051 \times 10^7 \text{ s}^{-1}$ | $5.300 \times 10^8 \text{ s}^{-1}$ |

## NMR and Mass spectra

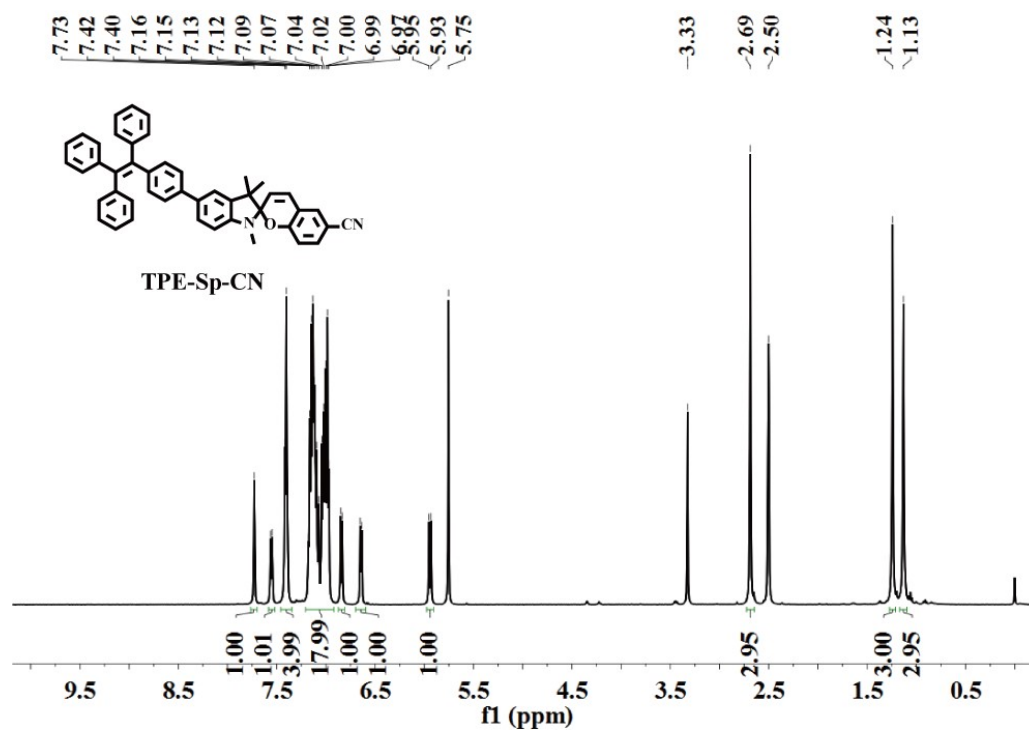

Fig. 25  $^1\text{H}$  NMR spectrum of TPE-Sp-CN in  $\text{DMSO-}d_6$ .

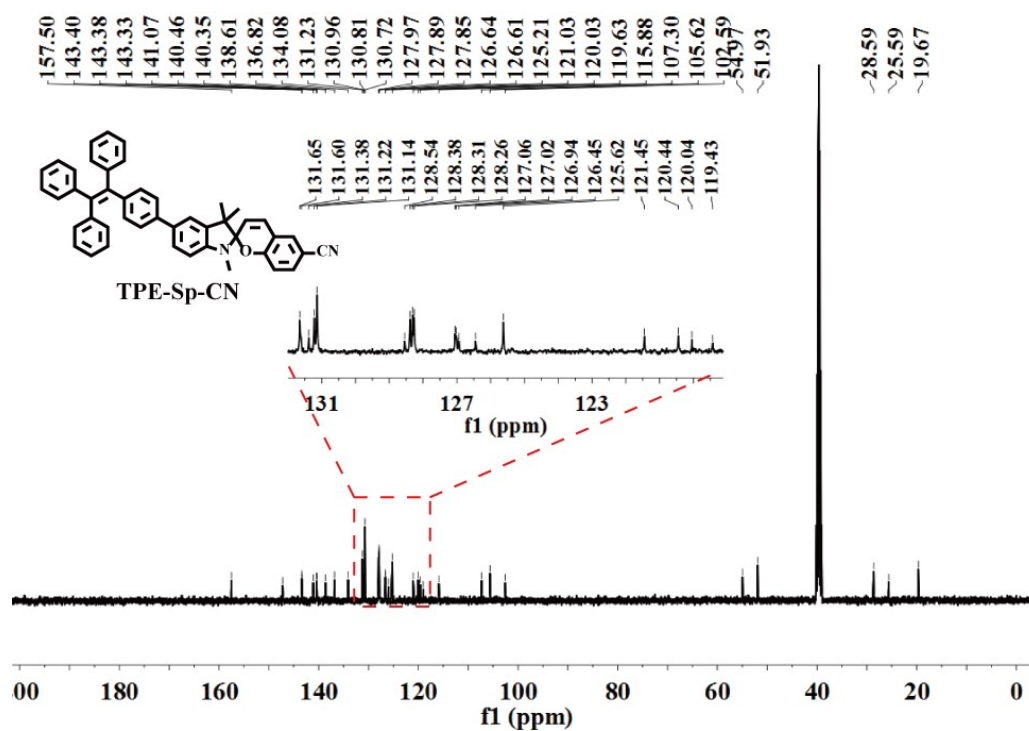

Fig. S26  $^{13}\text{C}$  NMR spectrum of TPE-Sp-CN in  $\text{DMSO-}d_6$ .

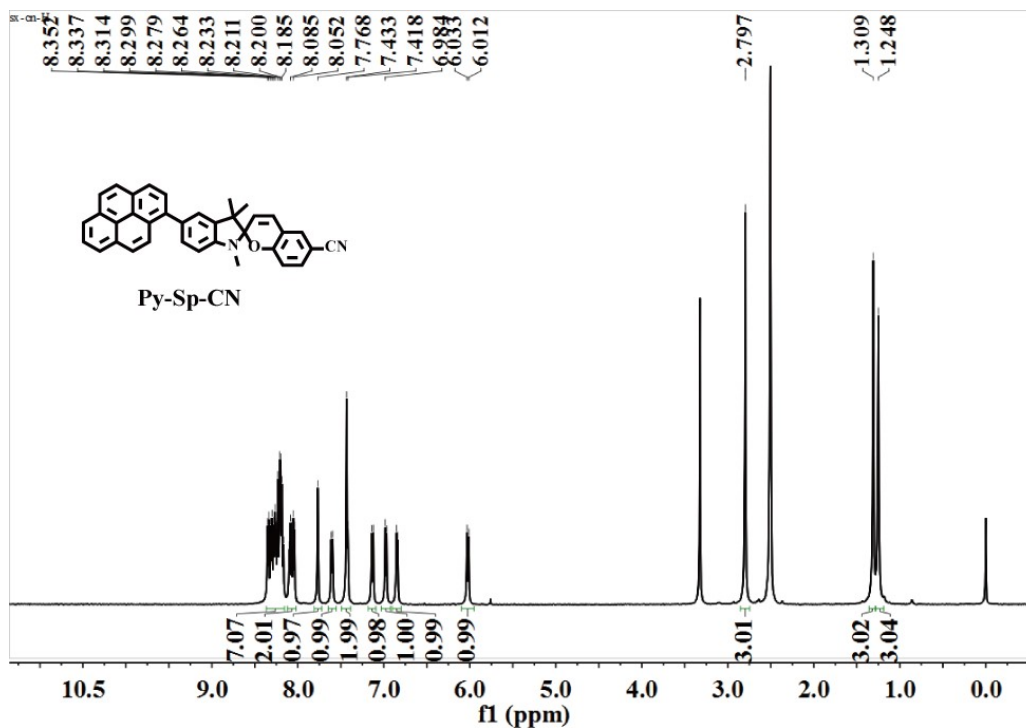

Fig. S27  $^1\text{H}$  NMR spectrum of Py-Sp-CN in  $\text{DMSO-}d_6$ .

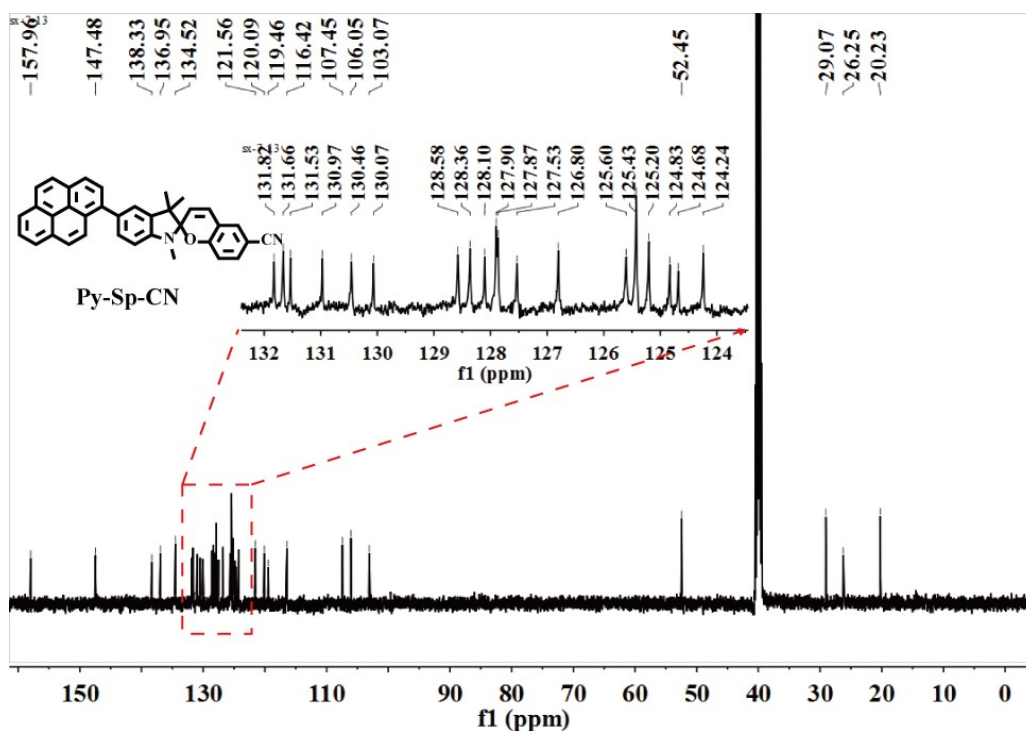

Fig. S28  $^{13}\text{C}$  NMR spectrum of Py-Sp-CN in  $\text{DMSO-}d_6$ .

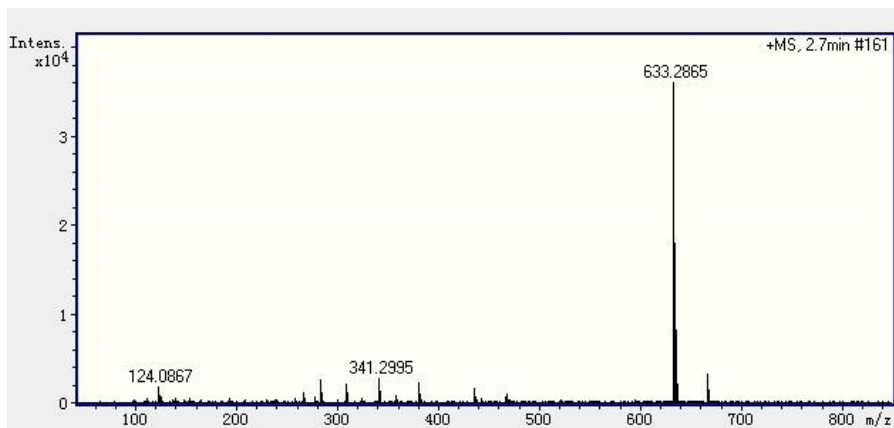

**Fig. S29** MS spectrum of TPE-Sp-CN.

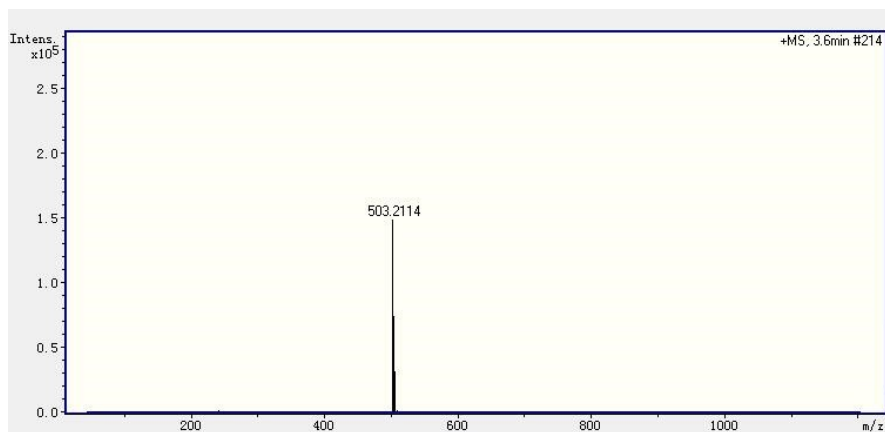

**Fig. S30** MS spectrum of Py-Sp-CN.

## Crystal data

*Crystal data:* [CCDC 1821887, 1900159 contains the supplementary crystallographic data for this the crystal of TPE-Sp-CN and Py-Sp-CN, respectively. These data can be obtained free of charge from The Cambridge Crystallographic Data Centre via [www.ccdc.cam.ac.uk/data\\_request/cif](http://www.ccdc.cam.ac.uk/data_request/cif).]

**Table S2.** Crystal data and structure refinement for TPE-Sp-CN.

|                                 |                                                                                                                                |
|---------------------------------|--------------------------------------------------------------------------------------------------------------------------------|
| Identification code             | TPE-Sp-CN                                                                                                                      |
| Empirical formula               | C <sub>47</sub> H <sub>38</sub> Cl <sub>2</sub> N <sub>2</sub> O                                                               |
| Formula weight                  | 717.69                                                                                                                         |
| Temperature                     | 273(2) K                                                                                                                       |
| Wavelength                      | 0.71073 Å                                                                                                                      |
| Crystal system, space group     | Monoclinic, <i>P</i> 21/ <i>c</i>                                                                                              |
| Unit cell dimensions            | $a = 20.728(9)$ Å $\alpha = 90^\circ$<br>$b = 11.337(5)$ Å $\beta = 107.633(8)^\circ$<br>$c = 17.818(8)$ Å $\gamma = 90^\circ$ |
| Volume                          | 3990(3) Å <sup>3</sup>                                                                                                         |
| Z, Calculated density           | 4, 1.195 g/cm <sup>-3</sup>                                                                                                    |
| Absorption coefficient          | 0.200 mm <sup>-1</sup>                                                                                                         |
| <i>F</i> (000)                  | 1504.0                                                                                                                         |
| Crystal size                    | 0.22 × 0.20 × 0.18 mm <sup>3</sup>                                                                                             |
| Theta range for data collection | 1.03 to 25.00°                                                                                                                 |
| Limiting indices                | -22 ≤ <i>h</i> ≤ 24, -11 ≤ <i>k</i> ≤ 13, -21 ≤ <i>l</i> ≤ 20                                                                  |
| Reflections collected / unique  | 22165 / 6987 [ <i>R</i> <sub>int</sub> = 0.1070]                                                                               |
| Completeness to theta = 25.00   | 99.3%                                                                                                                          |
| Absorption correction           | Multi-scan                                                                                                                     |
| Max. and min. transmission      | 0.9649 and 0.9574                                                                                                              |

|                                                     |                                    |
|-----------------------------------------------------|------------------------------------|
| Refinement method                                   | Full-matrix least-squares on $F^2$ |
| Data / restraints / parameters                      | 6987 / 61 / 501                    |
| Goodness-of-fit on $F^2$                            | 0.890                              |
| Final $R$ indices [ $I > 2\sigma(I)$ ] <sup>a</sup> | $R1 = 0.0866$ , $wR2 = 0.2215$     |
| $R$ indices (all data)                              | $R1 = 0.2198$ , $wR2 = 0.2971$     |
| Extinction coefficient                              | 0.0053(11)                         |
| Largest diff. peak and hole                         | 0.533 and -0.324 e.Å <sup>-3</sup> |



**Table S3.** Crystal data and structure refinement for Py-Sp-CN.

|                                                                  |                                                                                                                            |
|------------------------------------------------------------------|----------------------------------------------------------------------------------------------------------------------------|
| Identification code                                              | Py-Sp-CN                                                                                                                   |
| Empirical formula                                                | C <sub>36</sub> H <sub>26</sub> N <sub>2</sub> O                                                                           |
| Formula weight                                                   | 502.59                                                                                                                     |
| Temperature                                                      | 299.73 K                                                                                                                   |
| Wavelength                                                       | 0.71073 Å                                                                                                                  |
| Crystal system, space group                                      | Orthorhombic, <i>P</i> 2 <sub>1</sub> 2 <sub>1</sub> 2 <sub>1</sub>                                                        |
| Unit cell dimensions                                             | <i>a</i> = 9.9020(5) Å <i>α</i> = 90°<br><i>b</i> = 14.4344(9) Å <i>β</i> = 90°<br><i>c</i> = 18.7537(11) Å <i>γ</i> = 90° |
| Volume                                                           | 2680.5(3) Å <sup>3</sup>                                                                                                   |
| Z, Calculated density                                            | 4, 1.245 g/cm <sup>-3</sup>                                                                                                |
| Absorption coefficient                                           | 0.075 mm <sup>-1</sup>                                                                                                     |
| <i>F</i> (000)                                                   | 1056                                                                                                                       |
| Crystal size                                                     | 0.05 × 0.04 × 0.03 mm <sup>3</sup>                                                                                         |
| Theta range for data collection                                  | 2.721 to 27.468°                                                                                                           |
| Limiting indices                                                 | -12 ≤ <i>h</i> ≤ 10, -18 ≤ <i>k</i> ≤ 18, -24 ≤ <i>l</i> ≤ 24                                                              |
| Reflections collected / unique                                   | 32303 / 6142 [ <i>R</i> <sub>int</sub> = 0.0387]                                                                           |
| Completeness to theta = 25.00                                    | 99.8%                                                                                                                      |
| Absorption correction                                            | Semi-empirical from equivalents                                                                                            |
| Max. and min. transmission                                       | 0.7456 and 0.6780                                                                                                          |
| Refinement method                                                | Full-matrix least-squares on <i>F</i> <sup>2</sup>                                                                         |
| Data / restraints / parameters                                   | 6142 / 0 / 355                                                                                                             |
| Goodness-of-fit on <i>F</i> <sup>2</sup>                         | 1.036                                                                                                                      |
| Final <i>R</i> indices [ <i>I</i> > 2σ( <i>I</i> )] <sup>a</sup> | <i>R</i> 1 = 0.0458, <i>wR</i> 2 = 0.0949                                                                                  |
| <i>R</i> indices (all data)                                      | <i>R</i> 1 = 0.0730, <i>wR</i> 2 = 0.1074                                                                                  |
| Extinction coefficient                                           | n/a                                                                                                                        |
| Largest diff. peak and hole                                      | 0.119 and -0.139 e.Å <sup>-3</sup>                                                                                         |
